# Supplementary material for: Mortality in Thai Nursing Homes Based on Antimicrobial-Resistant Enterobacterales Carriage and COVID-19 Lockdown Timing: A Prospective Cohort Study
Source: Antibiotics (Basel). 2022 Jun 2;11(6):762. doi: 10.3390/antibiotics11060762 (PMC9219865; doi:10.3390/antibiotics11060762)
Supplement: Supplementary file 1 [file antibiotics-11-00762-s001.zip › antibiotics-1738826-supplementary.pdf]

## Supplement materials

**Table S1. Microbiology results at enrollment (isolations)**

| <i>Enterobacterales</i>  | All isolation*<br>(N=226)<br>No. (%) | Quinolone resistance<br>(N=136)<br>No. (%) | 3 <sup>rd</sup> generation<br>cephalosporin resistance<br>(N=59)<br>No. (%) |
|--------------------------|--------------------------------------|--------------------------------------------|-----------------------------------------------------------------------------|
| <i>E. coli</i>           | 155 (68.58)                          | 102 (65.81)                                | 48 (30.97)                                                                  |
| <i>Klebsiella</i> spp.   | 31 (13.72)                           | 13 (41.94)                                 | 4 (12.90)                                                                   |
| <i>Enterobacter</i> spp. | 13 (5.75)                            | 7 (53.85)                                  | 2 (15.38)                                                                   |
| <i>Proteus</i> spp.      | 21 (9.29)                            | 12 (57.14)                                 | 4 (19.05)                                                                   |
| <i>Citrobacter</i> spp.  | 6 (2.65)                             | 2 (33.34)                                  | 1 (16.67)                                                                   |
| <b>Overall</b>           | 226                                  | 136 (60.18)                                | 59 (26.11)                                                                  |

\*All isolations were tested for carbapenems resistance by susceptibility of ertapenem, imipenem, meropenem, and doripenem

**Table S2. Incidence all-cause mortality rate among antimicrobial-resistant *Enterobacterales* carriage**

| Carriage    | No.<br>(N=136)<br>(%) | Death<br>(%)* | No of<br>person-day<br>(Per 1000 days) | HR<br>(95% CI)     | Incidence all-cause<br>mortality rate (95%<br>CI) |
|-------------|-----------------------|---------------|----------------------------------------|--------------------|---------------------------------------------------|
| AMR-EC*     | 101 (74.3)            | 18 (17.8)     | 30,704                                 | 3.20 (0.74, 13.83) | 0.59 (0.37, 0.93)                                 |
| Non-AMR-EC  | 35 (25.7)             | 2 (5.7)       | 11,455                                 | 1 (reference)      | 0.17 (0.04, 0.70)                                 |
| 3GCR-EC **  | 51 (37.5)             | 9 (17.7)      | 15,415                                 | 1.57 (0.64, 3.87)  | 0.58 (0.30, 1.12)                                 |
| Non 3GCR-EC | 85 (62.5)             | 11 (13.0)     | 26,744                                 | 1 (reference)      | 0.41 (0.23, 0.74)                                 |
| QREC***     | 95 (69.9)             | 17 (17.9)     | 28,882                                 | 2.45 (0.71, 8.42)  | 0.59 (0.37, 0.95)                                 |
| Non QREC    | 41 (30.2)             | 3 (7.3)       | 13,277                                 | 1 (reference)      | 0.23 (0.07, 0.70)                                 |

\*% per total carriage

**Table S3.** Comparison of incidence all-cause mortality rate by COVID-19 pandemic lockdown

| Timing                         | No. | No. death (%) | No of person-day (per 1000 days) | Incidence all-cause mortality rate (95% CI) |
|--------------------------------|-----|---------------|----------------------------------|---------------------------------------------|
| Pre COVID-19 pandemic lockdown | 142 | 6 (4.23)      | 19900                            | 0.30 (0.14, 0.67)                           |
| COVID-19 pandemic lockdown     | 136 | 15 (11.03)    | 24275                            | 0.62 (0.37, 1.02)                           |
| Overall                        | 142 | 21 (14.79)    | 44175                            | 0.48 (0.31, 0.73)                           |

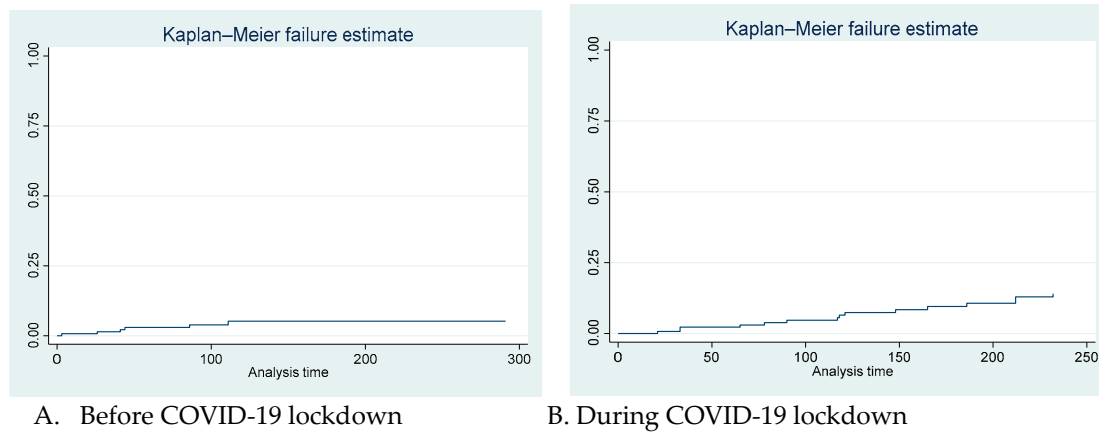

**Figure S1.** The mortality probability before COVID-19 lockdown (A) and during COVID-19 lockdown (B)

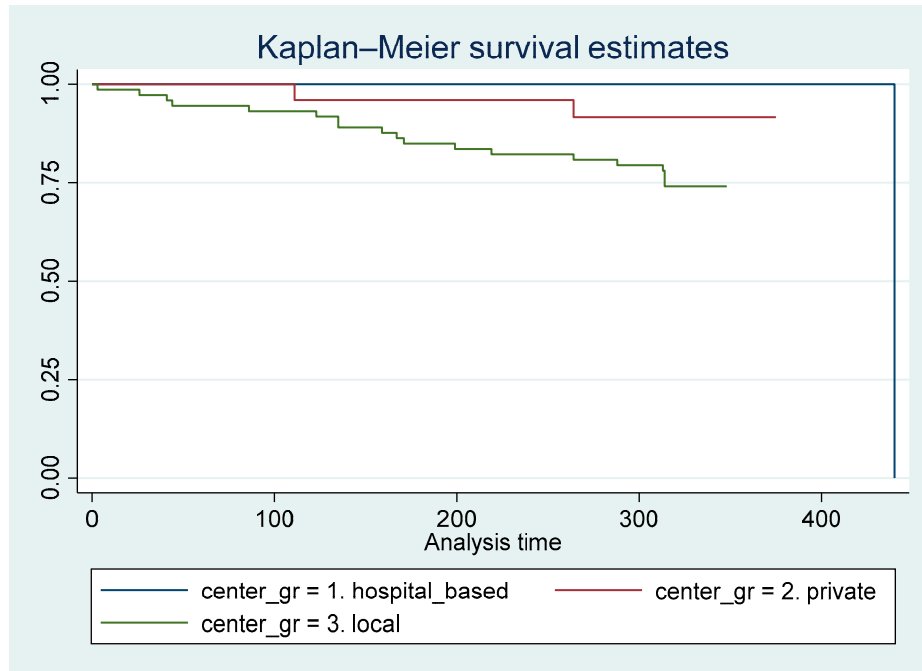

**Figure S2.** The survival probability between types of nursing home; Blueline: hospital based (profit) nursing home, red line: private (profit) nursing home, and green line: non-profit nursing home. ( $p$  value log rank  $<0.001$ )

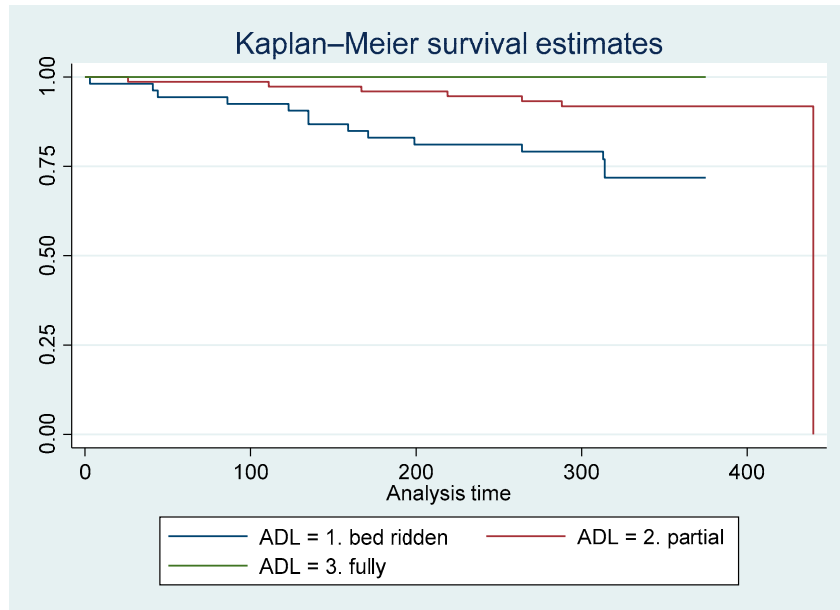

**Figure S3.** The survival probability between types of Activities Daily Living (ADLs); Blue line: dependence, red line: partial dependence, and green line: independence ( $p$  value log rank 0.004)
